# Supplementary material for: An optofluidic platform for cell-counting applications
Source: Royal Society of Chemistry journal article supplement (doi:10.1039/d3ay00344b), 2023-01-01

# Supporting Information

## An Optofluidic Platform for Cell-Counting Applications

Meryem Beyza Avci,<sup>†,‡</sup> S. Deniz Yasar<sup>†,¥</sup> and Arif E. Cetin<sup>†,\*</sup>

<sup>†</sup>Izmir Biomedicine and Genome Center, Balçova, Izmir 35340, Turkey

<sup>‡</sup>Department of Electrical and Electronics Engineering, Izmir University of Economics, Balçova, Izmir 35330, Turkey

<sup>¥</sup>Department of Biomedical Engineering, Izmir Katip Celebi University, Cigli, Izmir 35620, Turkey

\*Corresponding Author (Arif E. Cetin): arifengin.cetin@ibg.edu.tr

**Figure S1.** Flowchart for cell-counting algorithm to detect live and dead cells in the camera images.

**Live Cell Detection Algorithm**

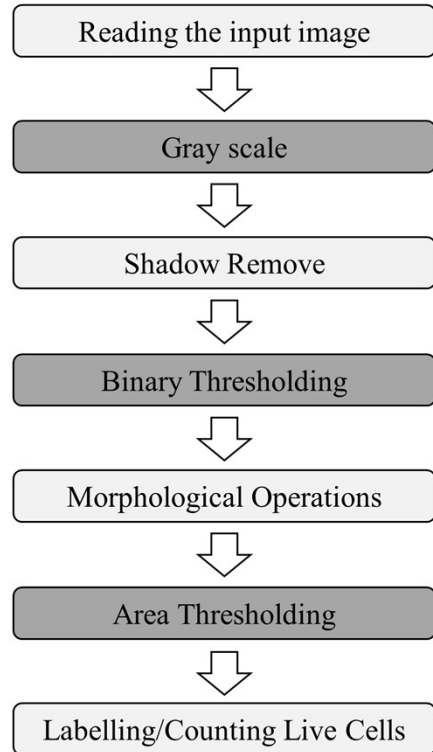

**Dead Cell Detection Algorithm**

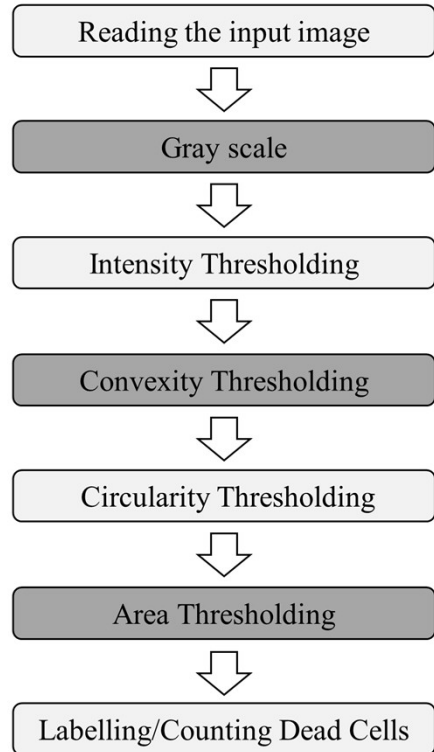

Supplement: d3ay00344b1.pdf [file d3ay00344b1.pdf]
